# Supplementary material for: Rational design of a high performance all solid state flexible micro-supercapacitor on paper
Source: Royal Society of Chemistry journal article supplement (doi:10.1039/c3ra41807c), 2013-01-01
Supplement: c3ra41807c.pdf [file c3ra41807c.pdf]

# Rational Design of High Performance All Solid State Flexible Micro-Supercapacitor on a Paper

Xu Wang,<sup>a</sup> Afriyanti Sumboja,<sup>a</sup> Wan Ling Foo,<sup>a</sup> Chao Yi Yan,<sup>a</sup> Kazuhito Tsukagoshi,<sup>b\*</sup> Pooi See Lee<sup>a\*</sup>

- a. School of Materials Science and Engineering, Nanyang Technological University, 639798, Singapore.
- b. International Center for Materials Nanoarchitectonics (MANA), National Institute for Materials Science, Tsukuba, Ibaraki 305-0044, Japan, CREST, JST, Kawaguchi, Saitama 332-0012, Japan.

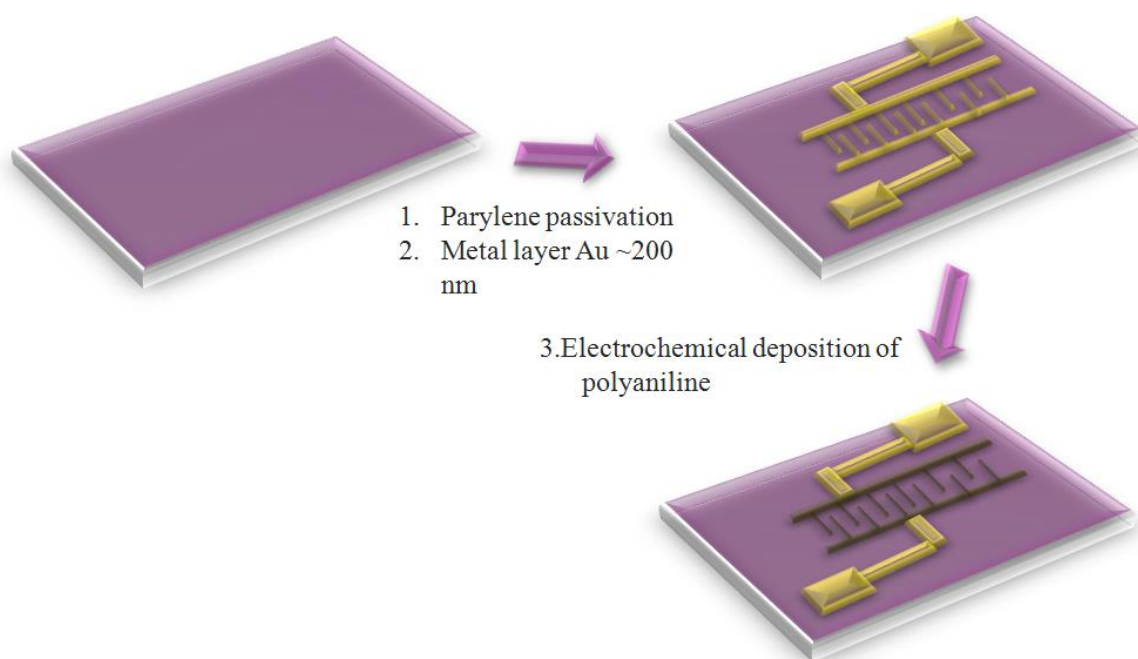

**Scheme 1.** Fabrication process of micro-supercapacitor on a paper.

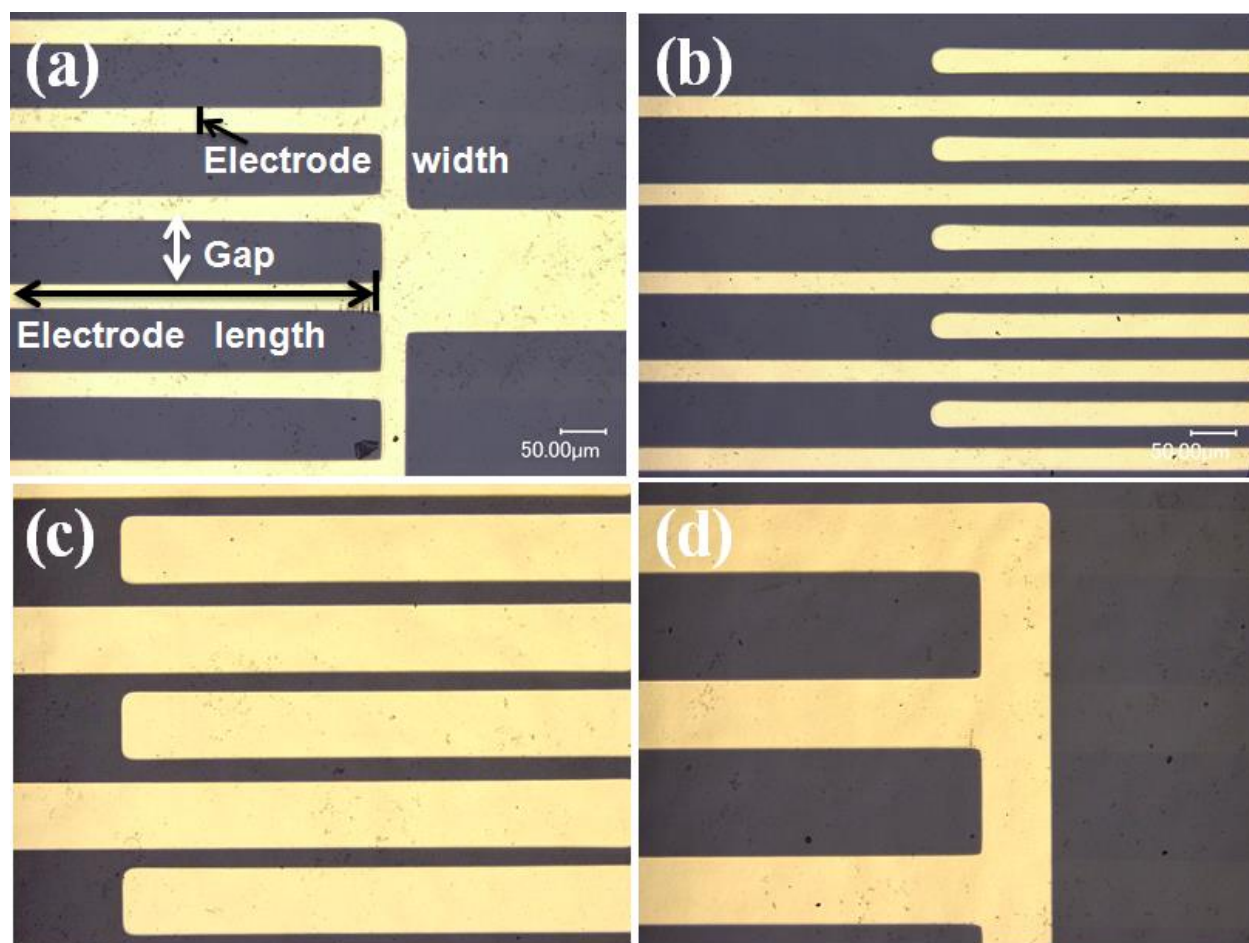

**Figure S1.** Optical microscope images of different interdigital finger electrode patterns (a) and (b) MC-3; (c) and (d) MC-2.

**Tabel S1.** Specifics of interdigital finger electrode design

| Design/Pattern | Electrode length/ $\mu\text{m}$ | Electrode width/ $\mu\text{m}$ | Gap/ $\mu\text{m}$ | Total Area/ $\text{cm}^2$ |
|----------------|---------------------------------|--------------------------------|--------------------|---------------------------|
| MC-1           | 5000                            | 500                            | 300                | 0.15                      |
| MC-2           | 5000                            | 300                            | 300                | 0.15                      |
| MC-3           | 5000                            | 100                            | 300                | 0.15                      |
| MC-4           | 5000                            | 100                            | 500                | 0.08                      |
| MC-5           | 5000                            | 100                            | 300                | 0.08                      |
| MC-6           | 5000                            | 100                            | 100                | 0.08                      |

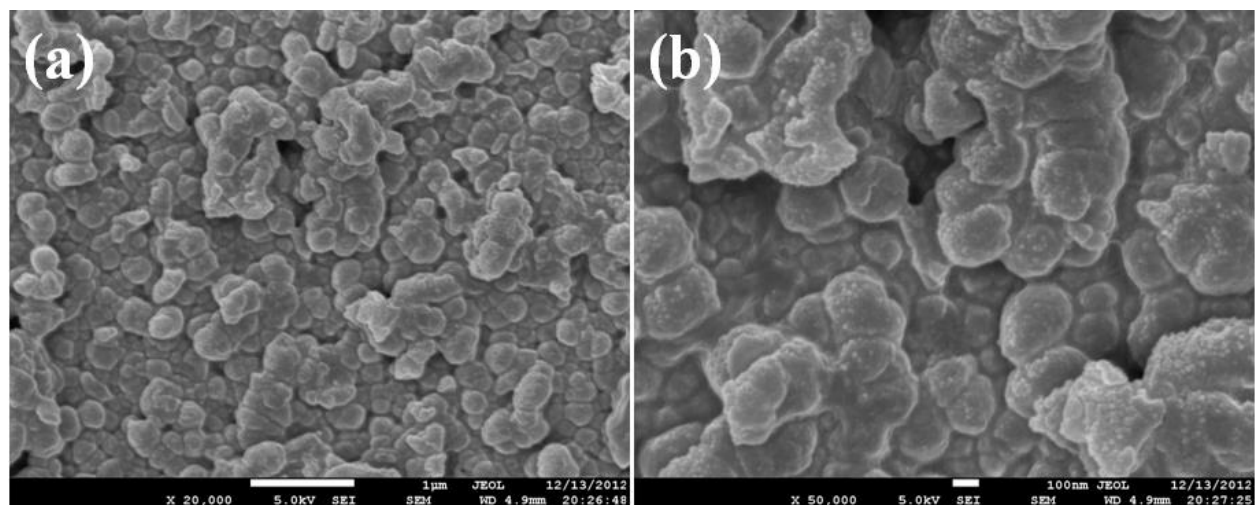

**Figure S2.** SEM images of PANI prepared by potentially dynamic deposition from -0.2 to 0.9 V vs SCE for 150 cycles.

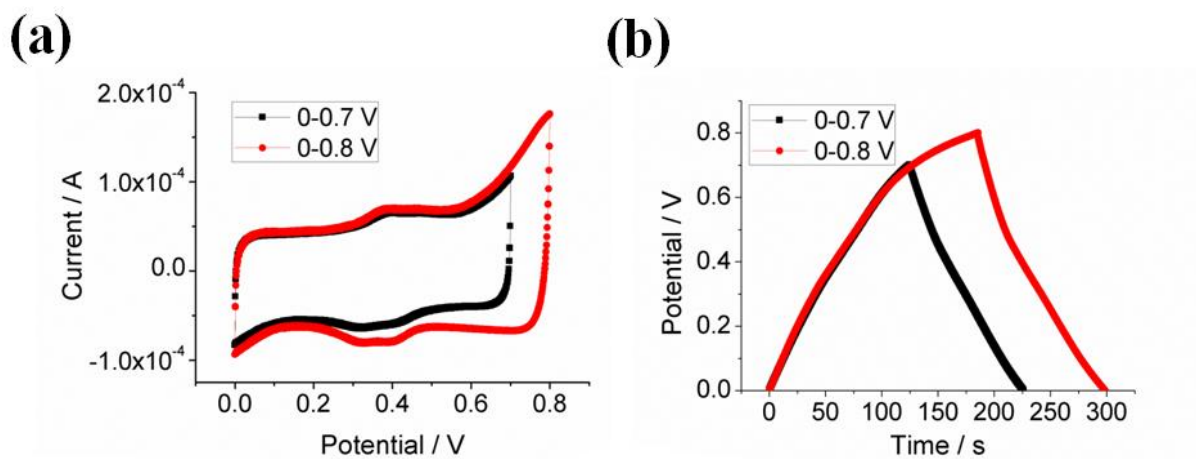

**Figure S3.** (a) CV curves of sample MC-1-100 from 0~0.7 V and 0~0.8 V respectively; (b) charge-discharge curves of sample MC-1-100 from 0~0.7 V and 0~0.8 V respectively.

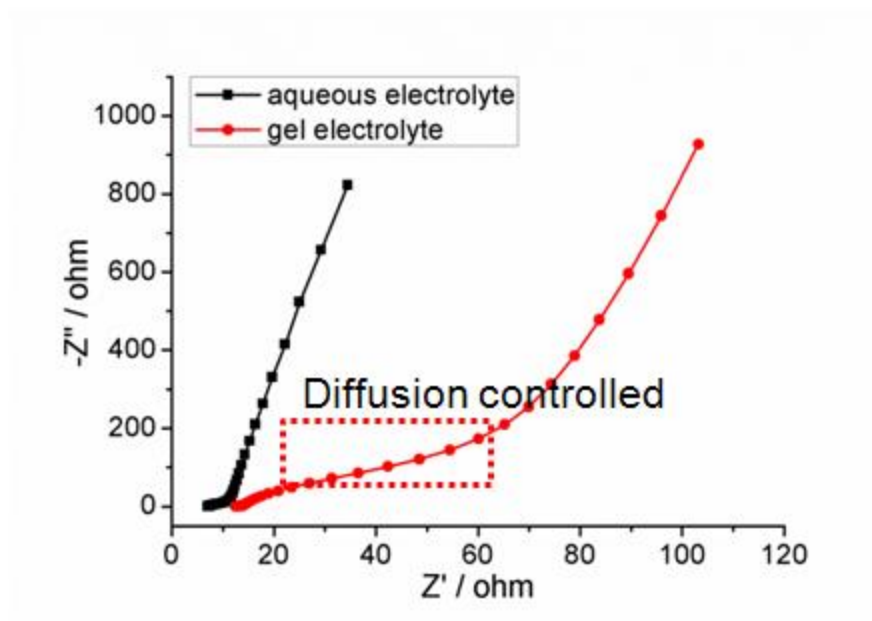

**Figure S4.** Nyquist plots of sample MC-5-200 tested in aqueous electrolyte and gel electrolyte.

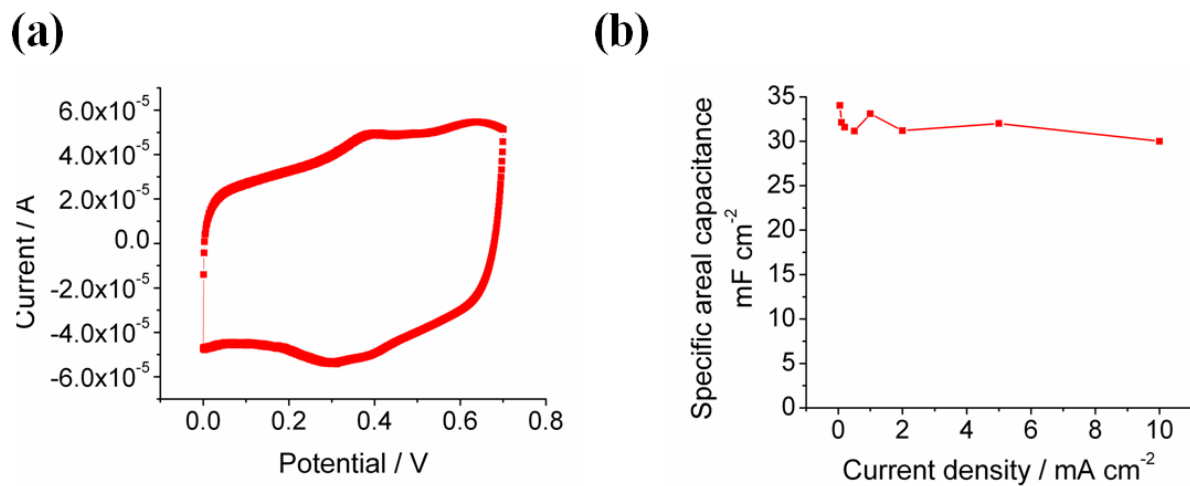

**Figure S5.** (a) CV curve of pure PANI symmetric device prepared using the same condition with sample MC-5-200, tested in 1 M  $\text{H}_2\text{SO}_4$ ; (b) relationships between specific areal capacitance and current density of pure PANI device, tested in 1 M  $\text{H}_2\text{SO}_4$ .

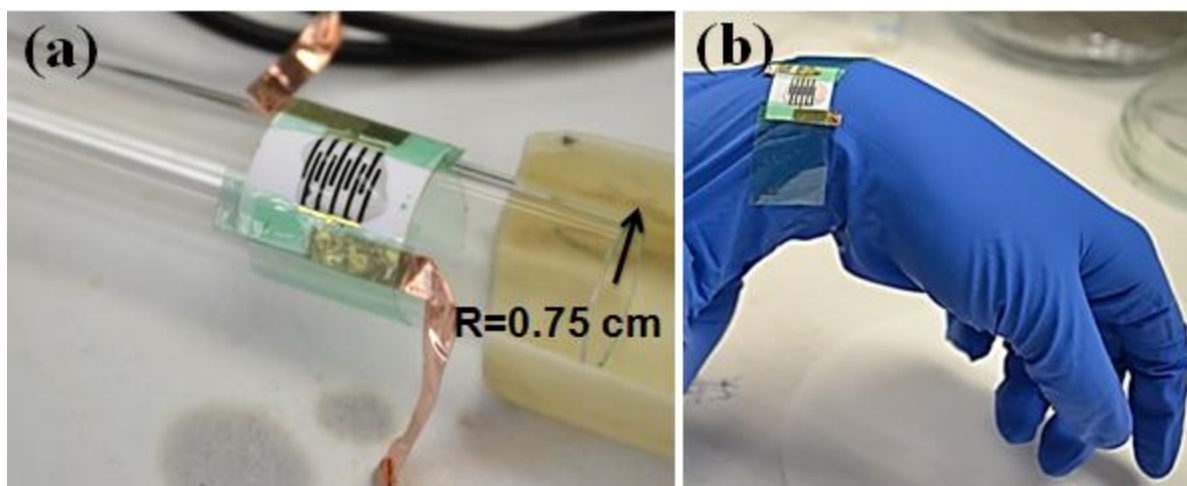

**Figure S6.** (a) Digital image of device tested in bent state; (b) demonstration of micro supercapacitor device wearing on the human wrist.
